# Supplementary material
Source: publisher figshare collection journal article supplement (https://acs.figshare.com/ndownloader/files/5855769)
Supplement: Supplementary file 1 [file 5855769]

## Changes in mean, median and modal sizes

### Ice

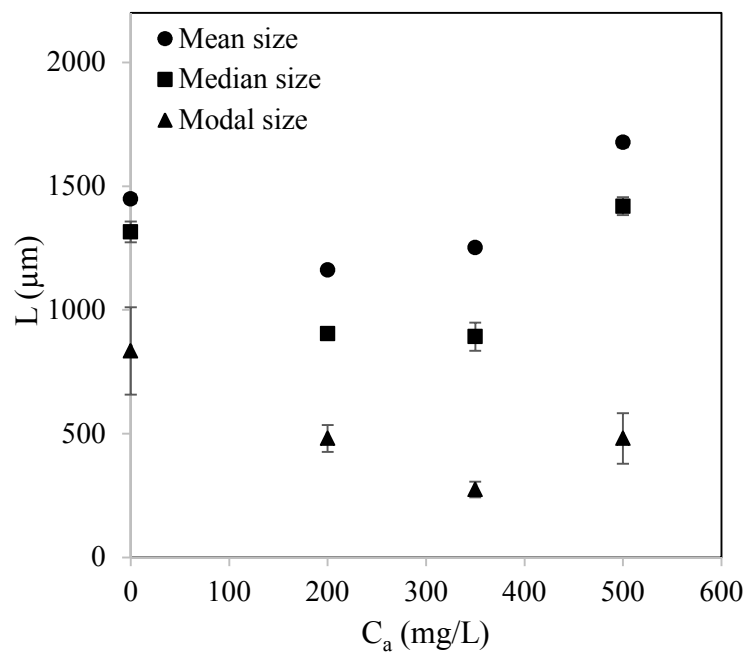

**Figure a: Changes in mean, median and modal sizes of ice particles with increase in antiscalant concentration**

### Salt

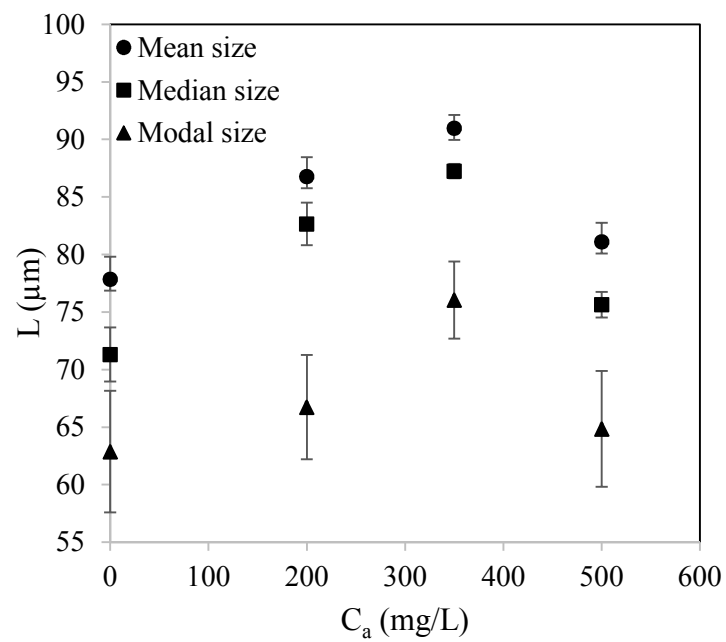

**Figure b: Changes in mean, median and modal sizes of salt crystals with increase in antiscalant concentration**
